# Supplementary material for: Crystal phase transition and polyhedron transformation towards the evolution of photoluminescence and the improvement of thermal stability in efficient blue-emitting Ba0.47−xSr0.50+xAl2Si2O8:Eu2+
Source: Royal Society of Chemistry journal article supplement (doi:10.1039/d1dt01140e), 2021-01-01
Supplement: d1dt01140e1.pdf [file d1dt01140e1.pdf]

## Electronic Supplementary Information

### Crystal-phase Transition and Polyhedron Transformation towards Evolution of Photoluminescence and Improvement of Thermal Stability in Efficient Blue-emitting $\text{Ba}_{0.47-x}\text{Sr}_{0.50+x}\text{Al}_2\text{Si}_2\text{O}_8:\text{Eu}^{2+}$

Haoran Li<sup>a</sup>, Yujun Liang<sup>a,\*</sup>, Shiqi Liu<sup>a</sup>, Weilun Zhang<sup>a</sup>, Yanying Bi<sup>a</sup>, Yuming Gong<sup>a</sup>, Wen Lei<sup>a,b,\*</sup>

<sup>a</sup>Engineering Research Center of Nano-Geomaterials of Ministry of Education, Faculty of Materials Science and Chemistry, China University of Geosciences, Wuhan 430074, China. *E-mail:* [yujunliang@sohu.com](mailto:yujunliang@sohu.com)

<sup>b</sup>School of Electrical, Electronic and Computer Engineering, The University of Western Australia, 35 Stirling Highway Crawley, WA 6009, Australia. *E-mail:* [wen.lei@uwa.edu.au](mailto:wen.lei@uwa.edu.au)

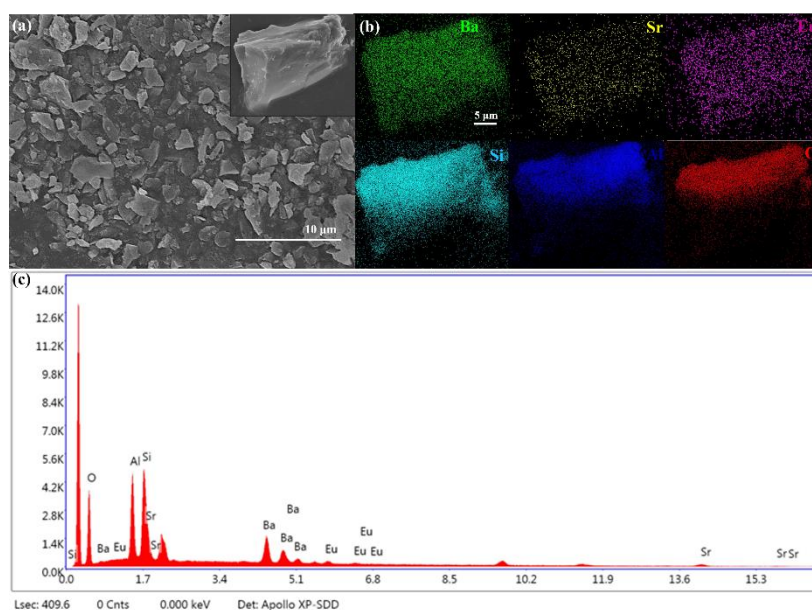

Fig. S1 (a) SEM images, (b) corresponding elemental mapping of Ba, Sr, Eu, Si, Al and O, respectively, and (c) EDS spectra of  $\text{Ba}_{0.47}\text{Sr}_{0.50}\text{Al}_2\text{Si}_2\text{O}_8:0.03\text{Eu}^{2+}$  sample.

Table S1 The average EDS results of  $\text{Ba}_{0.47}\text{Sr}_{0.50}\text{Al}_2\text{Si}_2\text{O}_8:0.03\text{Eu}^{2+}$  sample.

| Element | Weight % | Atomic % | Net Int. | Error % | Kratio | Z      |
|---------|----------|----------|----------|---------|--------|--------|
| O K     | 33.22    | 59.34    | 54.20    | 9.23    | 0.1015 | 1.1560 |
| AlK     | 15.75    | 16.68    | 87.80    | 7.02    | 0.0751 | 1.0443 |
| SiK     | 14.26    | 14.51    | 83.00    | 7.08    | 0.0716 | 1.0698 |
| BaL     | 19.67    | 4.09     | 38.90    | 5.09    | 0.1565 | 0.7557 |
| EuL     | 1.45     | 0.27     | 2.40     | 28.36   | 0.0112 | 0.7533 |
| SrK     | 15.65    | 5.10     | 4.40     | 13.88   | 0.1425 | 0.7931 |

Table S2 Crystallographic parameters gained from Rietveld refinements for  $\text{Ba}_{0.47-x}\text{Sr}_{0.5+x}\text{Al}_2\text{Si}_2\text{O}_8$ :

0.03Eu ( $x = -50.0\%-47.0\%$ )

| Samples     | a      | b       | c       | V        | $\beta$  | $\gamma$ | $R_p$ | $R_{wp}$ | $R_{exp}$ | $\chi^2$ |
|-------------|--------|---------|---------|----------|----------|----------|-------|----------|-----------|----------|
| BASOE       | 5.2943 | 5.2943  | 7.7822  | 188.906  | 90.0000  | 120      | 4.48  | 6.25     | 3.32      | 3.55     |
| $x = -45\%$ | 5.2938 | 5.2938  | 7.7823  | 188.876  | 90.0000  | 120      | 6.74  | 8.77     | 3.62      | 5.86     |
| $x = -35\%$ | 5.2893 | 5.2893  | 7.7796  | 188.488  | 90.0000  | 120      | 8.07  | 10.70    | 3.51      | 9.35     |
| $x = -25\%$ | 5.2857 | 5.2857  | 7.7747  | 188.111  | 90.0000  | 120      | 6.46  | 8.90     | 3.42      | 6.76     |
| $x = -15\%$ | 8.5492 | 13.0277 | 14.3608 | 1448.568 | 115.0872 | 90       | 6.42  | 10.30    | 3.32      | 9.65     |
| $x = -10\%$ | 8.5351 | 13.0249 | 14.3542 | 1445.604 | 115.0529 | 90       | 5.41  | 7.28     | 3.22      | 5.12     |
| $x = -5\%$  | 8.5215 | 13.0186 | 14.3449 | 1441.630 | 115.0556 | 90       | 5.60  | 7.38     | 3.21      | 5.29     |
| BSASOE      | 8.5094 | 13.0174 | 14.3401 | 1438.683 | 115.0800 | 90       | 4.09  | 5.54     | 3.00      | 3.41     |
| $x = 10\%$  | 8.4850 | 13.0031 | 14.3183 | 1429.965 | 115.1532 | 90       | 8.56  | 10.90    | 4.66      | 5.51     |
| $x = 25\%$  | 8.4360 | 12.9904 | 14.2953 | 1417.060 | 115.2364 | 90       | 3.98  | 5.40     | 2.91      | 3.43     |
| $x = 40\%$  | 8.3970 | 12.9751 | 14.2691 | 1405.413 | 115.3093 | 90       | 8.53  | 11.10    | 4.26      | 6.75     |
| SASOE       | 8.3831 | 12.9729 | 14.2635 | 1402.086 | 115.3285 | 90       | 4.47  | 6.37     | 2.57      | 6.13     |

Note:  $\alpha = 90^\circ$  for all the samples

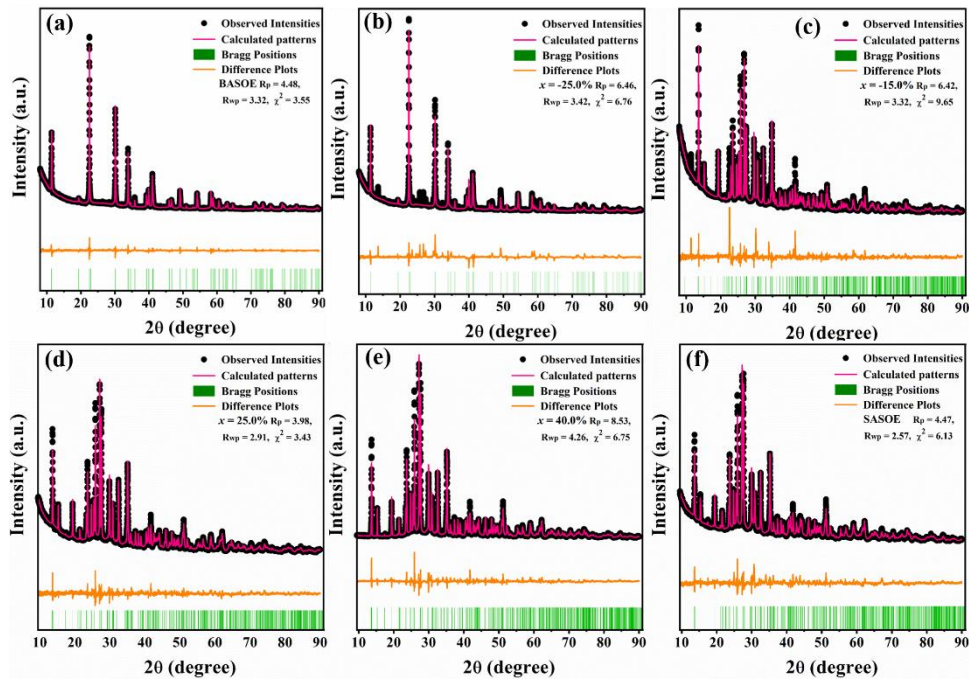

Fig. S2 The Rietveld refinement XRD patterns of BASOE,  $x = -25.0\%$ ,  $x = -15.0\%$ ,  $x = 25.0\%$ ,  $x = 25.0\%$  and SASOE samples.

Table S3 CIE coordinates for  $\text{Ba}_{0.47-x}\text{Sr}_{0.5+x}\text{Al}_2\text{Si}_2\text{O}_8: 0.03\text{Eu}$  ( $x = -50.0\%-47.0\%$ )

| Samples     | CIE Coordinates |        |
|-------------|-----------------|--------|
|             | x               | y      |
| BASOE       | 0.1919          | 0.2365 |
| $x = -45\%$ | 0.1816          | 0.1992 |
| $x = -40\%$ | 0.1761          | 0.1827 |
| $x = -35\%$ | 0.1652          | 0.1471 |
| $x = -30\%$ | 0.1543          | 0.1147 |
| $x = -25\%$ | 0.1599          | 0.1317 |
| $x = -20\%$ | 0.1528          | 0.1122 |
| $x = -15\%$ | 0.1523          | 0.1057 |
| $x = -10\%$ | 0.1516          | 0.1021 |
| $x = -5\%$  | 0.1523          | 0.1038 |
| BSASOE      | 0.1520          | 0.1016 |
| $x = 10\%$  | 0.1531          | 0.0922 |
| $x = 20\%$  | 0.1539          | 0.0895 |
| $x = 25\%$  | 0.1541          | 0.0993 |
| $x = 30\%$  | 0.1548          | 0.0884 |
| $x = 40\%$  | 0.1560          | 0.0820 |
| $x = 47\%$  | 0.1572          | 0.0958 |

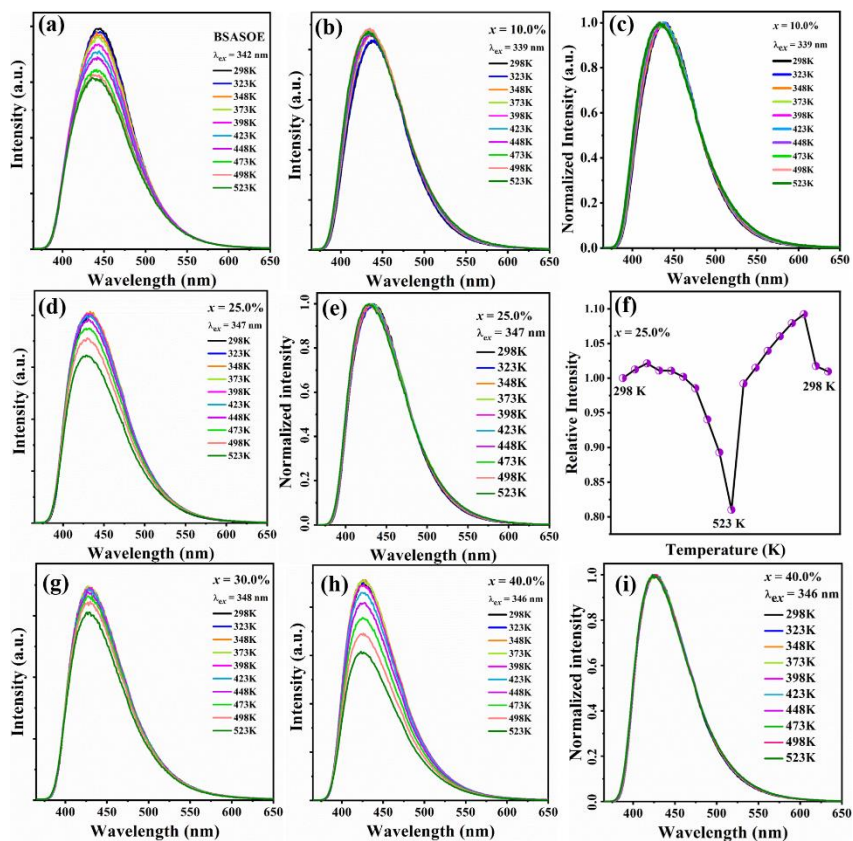

Fig. S3 The PL spectra of (a) BSASOE, (b)  $x = 10.0\%$ , (d)  $x = 25.0\%$ , (g)  $x = 30.0\%$  and (h)  $x = 40.0\%$  samples, and the normalized PL spectra of (c)  $x = 10.0\%$ , (e)  $x = 25.0\%$  and (i)  $x = 40.0\%$  samples at various temperatures (298-523 K), respectively; (f) The corresponding emission intensity with one heating and cooling cycles of the  $x = 25.0\%$  sample from 298 to 523 K.

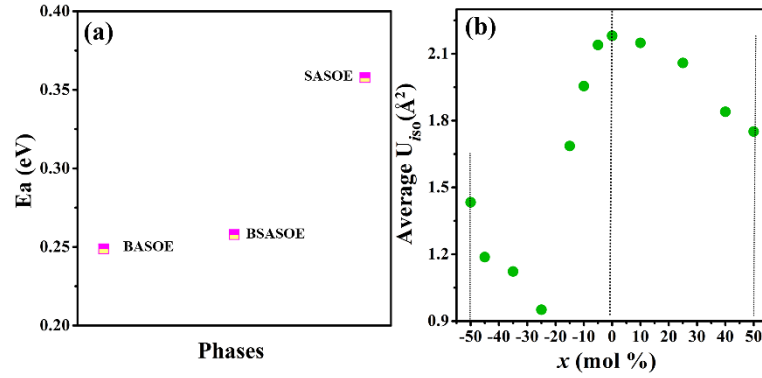

Fig. S4 (a) The activation energy ( $E_a$ ) values for BASOE, BSASOE and SASOE samples which are obtained from the temperature-dependent PL intensity. (b) The calculated average  $U_{iso}$  values from the XRD Rietveld refinement for  $\text{Ba}_{0.47-x}\text{Sr}_{0.50+x}\text{Al}_2\text{Si}_2\text{O}_8:0.03\text{Eu}$  ( $x = -50.0\%-47.0\%$ ).

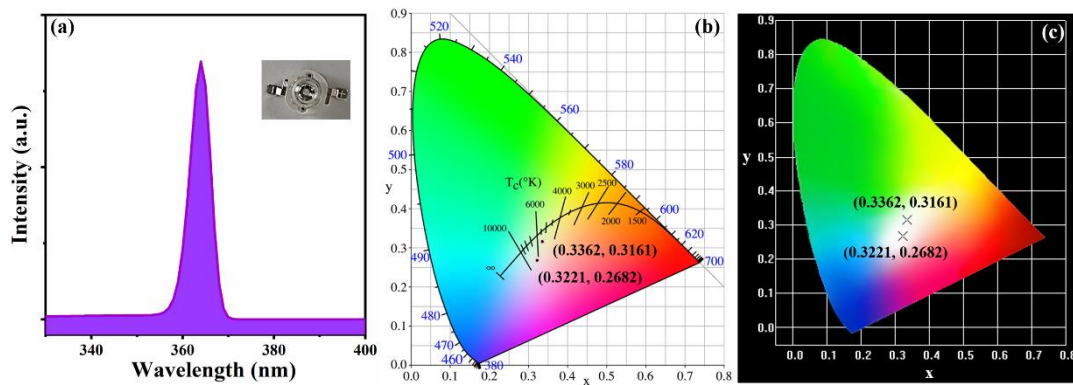

Fig. S5 (a) The emission spectrum of 365 nm LED chip; insert is the photograph of the semi-finished lamp bead. (b) and (c) CIE chromaticity coordinates diagrams for the two fabricated devices in different versions of CIE 1931.
